# Supplementary material
Source: PubMed Central journal article supplement (PMC3030399)
Supplement: supp_M110.179176_jbc.M110.179176-2.pdf [file supp_M110.179176_jbc.M110.179176-2.pdf]

Fig. S2

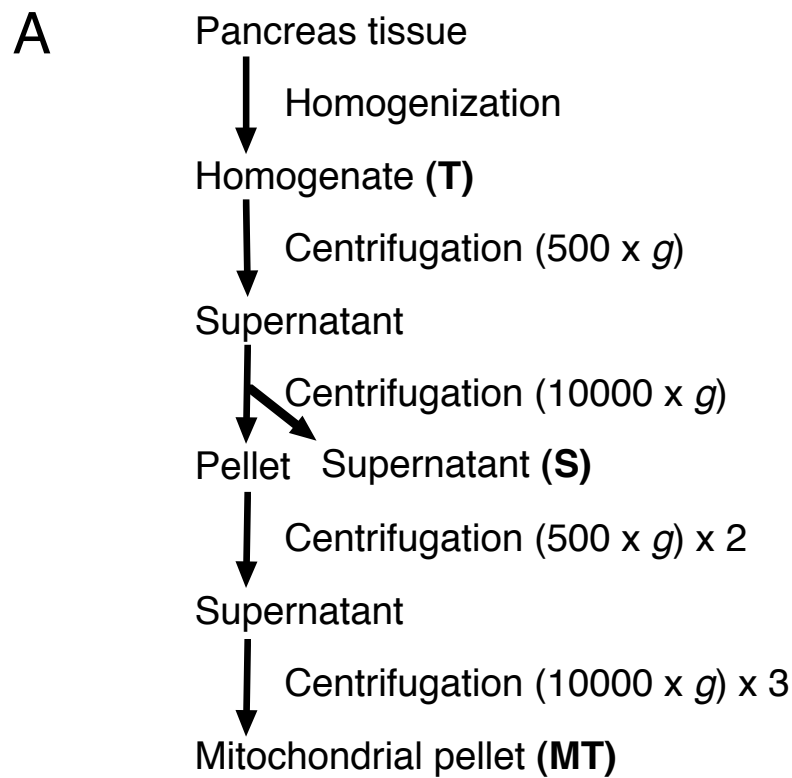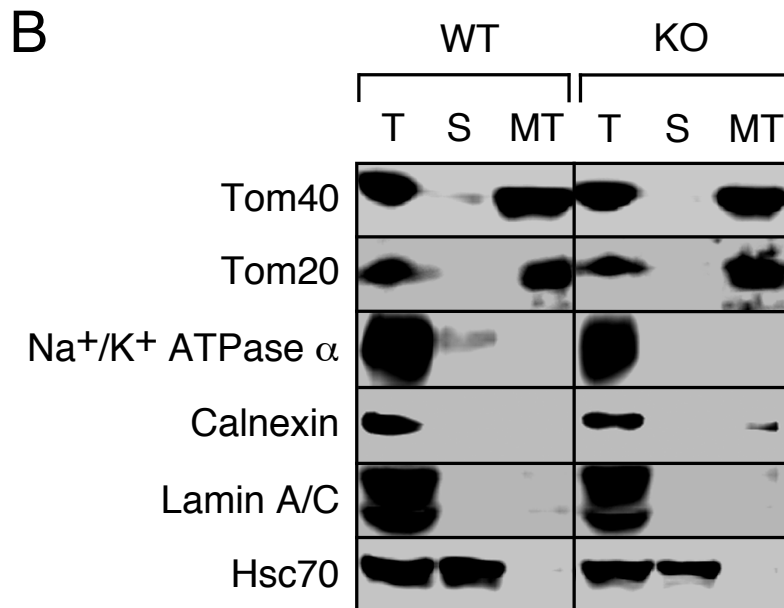

**FIGURE S2. Purification of pancreatic mitochondria.** A, Purification procedure for isolation of mitochondria. Detailed procedure is shown in “EXPERIMENTAL PROCEDURES”. B, Immunoblot analysis of purified mitochondria. The recovered fractions represented by “T”, “S” and “MT” shown in A were subjected to immunoblot analysis. Tom40 and Tom20 are mitochondrial membrane proteins. Na<sup>+</sup>/K<sup>+</sup> ATPase ± is a plasma membrane protein. Calnexin is a membrane protein of ER. Lamin A/C is a nuclear lamina protein. Hsc70 is a cytosolic protein.
